# Supplementary material for: Quality of Life in Electrochemotherapy for Cutaneous and Mucosal Head and Neck Tumors
Source: MDPI journal article supplement (doi:10.3390/jcm10194366), 2021-09-24
Supplement: s1 [file s1]

**Supplementary Table S1.** Karnofsky Performance status, EORTC QLQ-C30 and H&N35 questionnaires results (means and standard deviations).

| Scores                             | T0          | T1 (1 month) | T2 (3 months) | T3 (6 months) |
|------------------------------------|-------------|--------------|---------------|---------------|
| Karnofsky performance status       | 81.1 ± 16.5 | 80.0 ± 16.6  | 83.3 ± 15.7   | 80.9 ± 14.5   |
| <i>EORTC QLQ-C30 questionnaire</i> |             |              |               |               |
| Global health status               | 37.6 ± 18.1 | 46.0 ± 14.5  | 46.7 ± 14.9   | 59.8 ± 20.7   |
| Physical functioning               | 63.2 ± 23.7 | 64.2 ± 23.5  | 68.1 ± 19.1   | 64.2 ± 26.4   |
| Role functioning                   | 57.4 ± 33.4 | 56.8 ± 28.6  | 60.2 ± 22.2   | 63.6 ± 30.6   |
| Emotional functioning              | 67.9 ± 20.0 | 74.7 ± 13.4  | 74.5 ± 11.6   | 75.0 ± 26.9   |
| Cognitive functioning              | 71.0 ± 24.3 | 74.7 ± 27.1  | 77.8 ± 22.1   | 84.8 ± 15.7   |
| Social functioning                 | 69.7 ± 24.9 | 78.4 ± 17.8  | 76.8 ± 17.3   | 80.3 ± 28.7   |
| Fatigue                            | 39.5 ± 25.5 | 43.2 ± 27.4  | 35.2 ± 23.9   | 36.4 ± 32.2   |
| Nausea and vomiting                | 8.0 ± 14.9  | 9.9 ± 19.7   | 10.2 ± 21.5   | 6.1 ± 13.5    |
| Pain                               | 30.9 ± 29.1 | 23.4 ± 20.3  | 24.1 ± 21.5   | 24.2 ± 31.9   |
| Dyspnea                            | 25.9 ± 28.2 | 19.4 ± 21.2  | 18.5 ± 17.0   | 21.2 ± 34.2   |
| Insomnia                           | 32.1 ± 33.9 | 21.0 ± 22.9  | 20.4 ± 23.3   | 24.2 ± 39.7   |
| Appetite loss                      | 29.6 ± 35.0 | 17.3 ± 26.7  | 20.4 ± 30.5   | 24.2 ± 39.7   |
| Constipation                       | 23.4 ± 30.4 | 14.8 ± 21.3  | 14.8 ± 20.5   | 9.1 ± 15.6    |
| Diarrhea                           | 9.9 ± 18.0  | 2.5 ± 8.9    | 5.5 ± 12.8    | 21.2 ± 34.2   |
| Financial difficulties             | 11.1 ± 22.6 | 4.9 ± 15.2   | 5.5 ± 17.1    | 12.1 ± 30.8   |
| <i>H&amp;N35 questionnaire</i>     |             |              |               |               |
| Pain                               | 20.1 ± 17.5 | 18.8 ± 18.3  | 18.0 ± 17.4   | 7.6 ± 12.0    |
| Swallowing                         | 14.8 ± 21.6 | 20.4 ± 23.3  | 16.2 ± 19.5   | 12.9 ± 17.2   |
| Senses problems                    | 18.5 ± 25.0 | 21.6 ± 24.8  | 19.4 ± 20.0   | 13.6 ± 20.8   |
| Speech problems                    | 22.6 ± 20.8 | 28.4 ± 23.9  | 24.1 ± 21.6   | 22.2 ± 22.8   |
| Trouble with social eating         | 14.8 ± 15.0 | 21.3 ± 24.2  | 19.4 ± 19.8   | 16.7 ± 19.7   |
| Trouble with social contact        | 12.1 ± 15.8 | 17.8 ± 17.4  | 15.9 ± 15.4   | 15.1 ± 22.7   |
| Less sexuality                     | 28.4 ± 39.7 | 42.6 ± 37.6  | 39.8 ± 36.7   | 40.9 ± 40.4   |
| Teeth                              | 13.6 ± 19.1 | 12.3 ± 21.0  | 14.8 ± 23.5   | 15.1 ± 22.9   |
| Opening mouth                      | 39.5 ± 35.8 | 28.4 ± 30.2  | 27.8 ± 34.8   | 21.2 ± 22.5   |
| Dry mouth                          | 18.5 ± 28.2 | 13.6 ± 24.9  | 7.4 ± 18.3    | 21.2 ± 22.5   |
| Sticky saliva                      | 24.7 ± 23.7 | 28.4 ± 28.8  | 24.1 ± 29.8   | 24.2 ± 26.2   |
| Coughing                           | 14.8 ± 19.2 | 7.4 ± 16.9   | 3.7 ± 10.8    | 3.0 ± 10.0    |
| Felt ill                           | 7.4 ± 16.9  | 11.1 ± 16.0  | 14.8 ± 17.0   | 9.1 ± 21.5    |
| Pain killers                       | 51.8 ± 50.9 | 51.8 ± 50.9  | 61.1 ± 50.2   | 45.4 ± 52.2   |
| Nutritional supplements            | 33.3 ± 48.0 | 33.3 ± 48.0  | 38.9 ± 50.2   | 9.1 ± 30.1    |
| Feeding tube                       | 3.7 ± 19.2  | 3.7 ± 19.2   | 5.5 ± 23.6    | 9.1 ± 30.1    |
| Weight loss                        | 37.0 ± 49.2 | 25.9 ± 44.6  | 27.8 ± 46.1   | 27.3 ± 46.7   |
| Weight gain                        | 3.7 ± 19.2  | 11.1 ± 32.0  | 16.7 ± 38.3   | 9.1 ± 30.1    |
